# Supplementary material for: A room-temperature rechargeable dual-plating lithium–aluminium battery
Source: Royal Society of Chemistry journal article supplement (doi:10.1039/d1cc03548g), 2021-01-01
Supplement: d1cc03548g1.pdf [file d1cc03548g1.pdf]

## Supplementary Information

### **A room-temperature rechargeable dual-plating lithium-aluminum battery**

Fangyu Xiong,<sup>a</sup> Zhouyang Jiang,<sup>b</sup> Shuangshuang Tan,<sup>a</sup> Qinyou An,<sup>a, c, \*</sup>

<sup>a</sup> State Key Laboratory of Advanced Technology for Materials Synthesis and Processing,  
Wuhan University of Technology, Wuhan, 430070, P. R. China

<sup>b</sup> School of Chemistry & Chemical Engineering, South China University of Technology,  
Guangzhou 510640, China

<sup>c</sup> Foshan Xianhu Laboratory of the Advanced Energy Science and Technology Guangdong  
Laboratory, Foshan 528200, P. R. China

#### **Corresponding Author**

\*E-mail: anqinyou86@whut.edu.cn (Q. An)

#### **Experimental Section**

##### *Materials Characterizations*

X-ray diffraction (XRD) patterns were obtained by Bruker D2 Phaser X-ray diffractometer with Cu K $\alpha$  X-ray source. The scanning electron microscopy (SEM) images and energy dispersive spectroscopy (EDS) elemental mappings were attained with JEOL-7100F microscope.

##### *Electrochemical Measurements*

The electrochemical performance of liquid electrolyte was evaluated by assembling CR2016 coin-type cells in an argon-filled glove box, and glass fiber membrane (GF/D What-man) was used as the separator. For Li-Al battery and “cathode-free” Li-Al battery, the “H”-type electrochemical pools was employed. The lithium metal foil pressing on steel mesh was used as anode with 1 M LiPF<sub>6</sub> dissolved in mixture of ethylene carbonate (EC), diethyl carbonate (DEC) and dimethyl carbonate (DMC) with volumetric ratio of 1:1:1 as electrolyte in anode side. 1 M LiAlCl<sub>4</sub> dissolved in AlCl<sub>3</sub>-[EMIm]Cl (1-ethyl-3-methylimidazolium chloride)

(1.3:1) was used as electrolyte in cathode side (catholyte) and  $\text{Li}_{1.5}\text{Al}_{0.5}\text{Ge}_{1.5}(\text{PO}_4)_3$  ceramic was used as separator to separate the electrolytes in two sides. The  $\text{Li}_{1.5}\text{Al}_{0.5}\text{Ge}_{1.5}(\text{PO}_4)_3$  ceramic separator was purchased from Hefei Kejing Materials Technology Co., Ltd., and the nominal thickness and ionic conductivity are 0.2 mm and  $4.5 \times 10^{-4} \text{ S cm}^{-1}$  at room temperature, respectively. For Li-Al battery, aluminum foil was used as cathode, while aluminum foil was replaced by Mo current collector in the “cathode-free” Li-Al battery. For “cathode-free” Li-Zn battery, except for that the catholyte is changed to 1 M  $\text{LiCF}_3\text{SO}_3$  and 0.5 M  $\text{Zn}(\text{CF}_3\text{SO}_3)_2$  dissolved in acetonitrile, the other components are same with “cathode-free” Li-Al battery. Galvanostatic charge/discharge and cyclic voltammetry (CV) test was performed by using a VMP3 multichannel electrochemical workstation (Bio-Logic France).

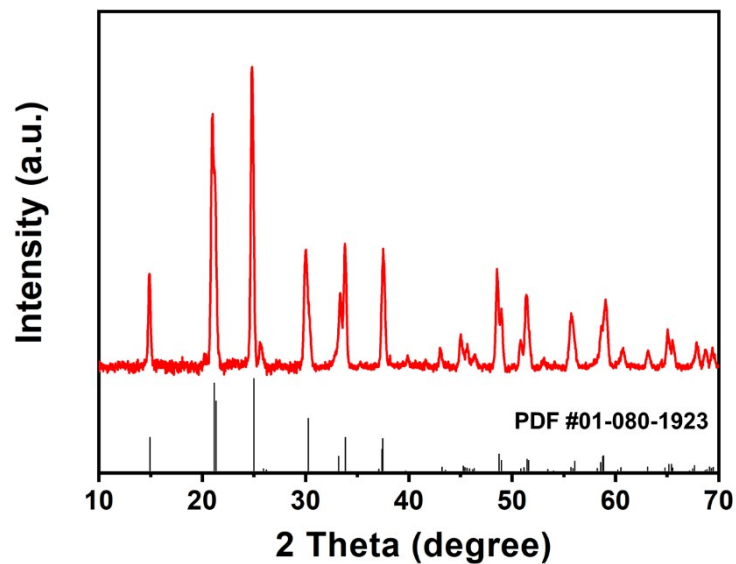

**Fig. S1** XRD pattern of  $\text{Li}_{1.5}\text{Al}_{0.5}\text{Ge}_{1.5}(\text{PO}_4)_3$  ceramic separator.

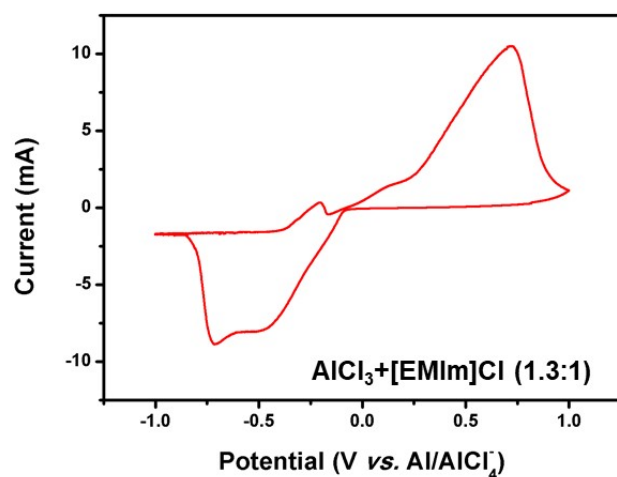

**Fig. S2** CV curve of Al-Mo battery with AlCl<sub>3</sub>-[EMIm]Cl (1.3:1) ionic liquid as electrolyte at 50 mV s<sup>-1</sup>.

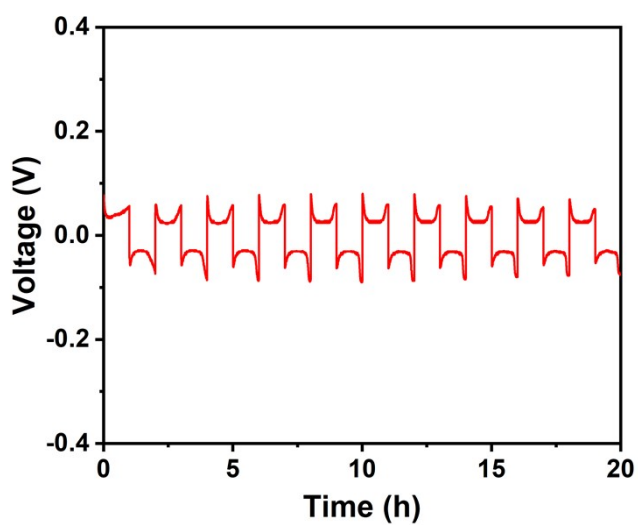

**Fig. S3** The voltage-time curves of Li-Li battery with lithium organic electrolyte at 0.5 mA cm<sup>-2</sup> without Li<sub>1.5</sub>Al<sub>0.5</sub>Ge<sub>1.5</sub>(PO<sub>4</sub>)<sub>3</sub> ceramic separator.

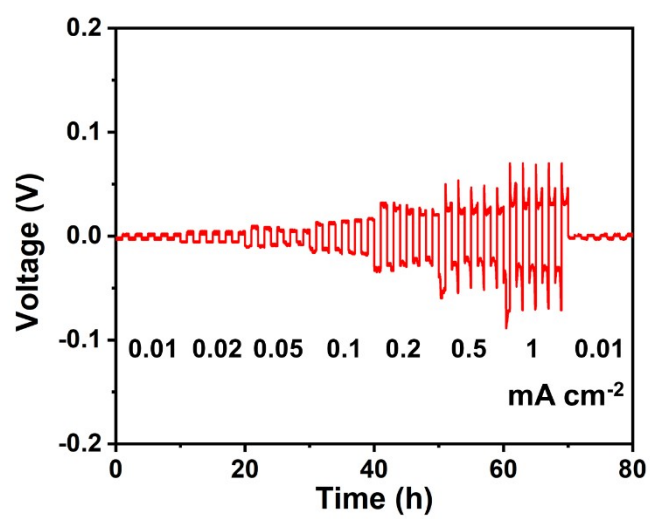

**Fig. S4** The voltage-time curves of Li-Li battery with lithium organic electrolyte at different current density.

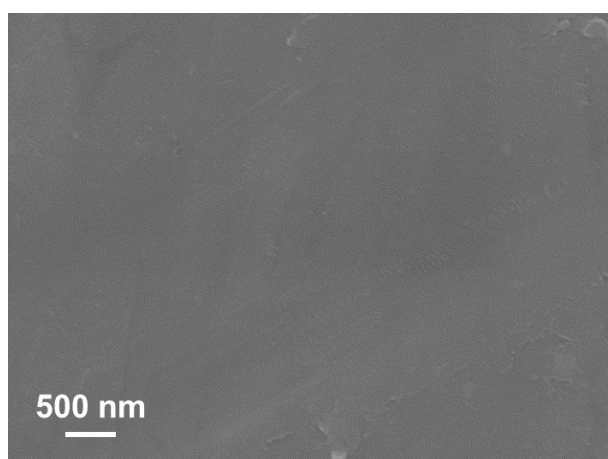

**Fig. S5** SEM image of Mo current collector before plating process
